# Supplementary material
Source: PubMed Central journal article supplement (PMC4660981)
Supplement: bi5b01002_si_001.pdf [file bi5b01002_si_001.pdf]

## Supporting Information for

# Helix-Capping Histidines: Diversity of N-H...N Hydrogen Bond Strength Revealed by $^{2\text{h}}J_{\text{NN}}$ Scalar Couplings

Matthew R. Preimesberger, Ananya Majumdar, Selena L. Rice, Lauren Que,  
and Juliette T.J. Lecomte

### Protein preparation

- Table S1: List of NMR samples and conditions
- Table S2: List of capping histidine  $\text{pK}_{\text{a}}$ s,  $^{2\text{h}}J_{\text{NN}}$ (observed), and  $^{2\text{h}}J_{\text{NN}}$ (capped)
- Table S3: List of histidine tautomers and microstate populations determined by simulation
- Figure S1: Ribbon structure of GlnN and cytochrome  $b_5$  emphasizing the location of the helix cap with respect to the heme active site
- Figure S2: Ser76 N-H...N $\delta$ 1 His79 H-bond in CtrHb, initial observation of  $^{1\text{h}}J_{\text{HN}}$  and  $^{2\text{h}}J_{\text{NN}}$  *trans* hydrogen bond scalar couplings
- Figure S3:  $^{2\text{h}}J_{\text{NN}}$  modulation curves for amide N-H...N $\delta$ 1 histidine hydrogen bonds in the conserved *i-to-i+3* motif of globins and *i-to-i-2* motif of cytochrome  $b_5$
- Figure S4: NH HSQC, long-range HMQC, and HNN-COSY spectra used for Asp82 N-H...N $\delta$ 1 His80 H-bond assignment within ferric *bis*-histidine cytochrome  $b_5$
- Figure S5: Bar graph summary of heme protein  $^{2\text{h}}J_{\text{NN}}$  values
- Figure S6: pH dependence of chemical shifts and  $^{2\text{h}}J_{\text{NN}}$  couplings observed for the solvent-exposed T110-H113 H-bond within the four-repeat consensus AR protein, NRRC
- Figure S7: Difference in His79  $\text{pK}_{\text{a}}$  between WT CtrHb-CN and L75H CtrHb-B-CN supported by NH HSQC and long-range HMQC data
- Figure S8:  $^1\text{H}$  1-D evidence for low His83  $\text{pK}_{\text{a}}$  in *Synechococcus* sp. PCC 7002 *bis*-His GlnN

## Protein preparation

Plasmid DNA encoding either *C. eugametos* CtrHb, *C. reinhardtii* THB1, *Synechococcus* sp. PCC 7002 GlnB or *Synechocystis* sp. PCC 6803 GlnB (and variants thereof) was used to transform *E. coli* BL21(DE3) cells, which were then grown at 37 °C for ~24 h on minimal medium plates. Transformant colonies were used to inoculate minimal medium (M9) starter cultures (~60–100 mL) and grown for an additional ~24 h at 37 °C. At this point, the starter culture was divided into fourths and used to seed 4 × 500 mL M9 expression cultures. To produce uniformly <sup>15</sup>N-labeled protein, <sup>15</sup>NH<sub>4</sub>Cl (Sigma) was used as the sole nitrogen source. For *C. eugametos* CtrHb, *C. reinhardtii* THB1 and *Synechocystis* GlnB, expression cultures were allowed to continue growing until an O.D. (550 nm) ~ 0.8 – 1.0 was achieved. Overexpression was induced by addition of 0.5 mM (final concentration) IPTG (Santa-Cruz Biotechnology), and was allowed to continue for ~5–8 h prior to cell harvesting by centrifugation. In the case of *Synechococcus* GlnB, leaky overexpression occurs and the IPTG addition step is not required. Harvested cells were frozen at –20 °C until further use.

The recombinant hemoglobins expressed in this manner partitioned primarily into inclusion bodies. Cells were lysed by sonication; soluble and insoluble fractions were separated by centrifugation, and the lysate was discarded. Inclusion bodies were solubilized in ~8 M urea (50 mM Tris, 1 mM EDTA, pH 8) and passed over a G-50 size exclusion column to achieve apoprotein refolding and purification. Fractions deemed pure by SDS-PAGE were pooled and reconstituted with porcine heme (> 98%, Sigma) to generate ferric holoprotein. Passage of the resulting solution over an anion exchange (DEAE) column removed any excess heme and resulted in > 95 % purity in the pooled protein samples. Buffer exchange (into ~1 mM phosphate, pH ~7) was achieved using an Amicon ultrafiltration unit and Millipore YM3 membrane (molecular weight cut off = 3 kDa). The pooled samples were concentrated to ~20 mL and protein concentration was assessed by optical spectroscopy as reported previously. Typical yields of recombinant hemoglobins were ~25–50 mg/L culture. Samples not used immediately for NMR spectroscopic studies were lyophilized and stored at –80 °C until needed.

A similar protocol was used for the expression and purification of <sup>15</sup>N-labeled rat microsomal cytochrome *b*<sub>5</sub>. Following overexpression in *E. coli* BL21(DE3) cells, recombinant cytochrome *b*<sub>5</sub> primarily partitioned to the soluble fraction. An excess of heme was added to the raw lysate in order to produce ferric holoprotein. Following the heme binding step, ferric cytochrome *b*<sub>5</sub> purification was achieved via DEAE anion exchange chromatography followed by G-50 size-exclusion chromatography. Apo cytochrome *b*<sub>5</sub> was prepared from ferric holoprotein using an acid-butanone heme extraction procedure (1:1 H<sub>2</sub>O/butanone, pH 2.5, 4 °C) followed by extensive dialysis and buffer exchange to remove residual butanone. Optical absorbance measurements on the resulting apocytochrome *b*<sub>5</sub> sample confirmed that > 99% of the heme had been removed.

**Table S1.** List of heme protein sample conditions<sup>a</sup>

| Protein                                            | Distal ligand    | Solvent                                                                   |
|----------------------------------------------------|------------------|---------------------------------------------------------------------------|
| WT CtrHb <sup>b</sup>                              | CN               | 125 mM phosphate, 10 mM KCN, pH ~7.2, 10% D <sub>2</sub> O                |
| L75H CtrHb-B                                       | CN               | 100 mM phosphate, 12 mM KC <sup>15</sup> N, pH ~7.2, 10% D <sub>2</sub> O |
| WT THB1                                            | CN               | 90% H <sub>2</sub> O, 3.3 mM KCN, pH 7.49, 10% D <sub>2</sub> O           |
| <i>Syn7002</i> Gln                                 | His              | 100 mM phosphate, pH ~7.1, 10% D <sub>2</sub> O                           |
| <i>Syn7002</i> Gln-A                               | His              | 100 mM phosphate, pH ~7.1, 10% D <sub>2</sub> O                           |
| <i>Syn6803</i> Gln                                 | CN               | 125 mM phosphate, pH 7.27, 10 mM KCN, 10% D <sub>2</sub> O                |
| <i>Syn6803</i> Gln-A                               | CN               | 125 mM phosphate, pH ~7.2, 10 mM KCN, 10% D <sub>2</sub> O                |
| <i>Syn6803</i> Gln                                 | His              | 125 mM phosphate, pH ~7.2, 10% D <sub>2</sub> O                           |
| <i>Syn6803</i> Gln-A                               | His              | 125 mM phosphate, pH ~7.2, 10% D <sub>2</sub> O                           |
| <i>Syn6803</i> Gln-B                               | His              | 25 mM phosphate, pH ~7.1, 10% D <sub>2</sub> O                            |
| <i>Syn6803</i> Gln-AB                              | His              | 125 mM phosphate, pH ~7.2, 10% D <sub>2</sub> O                           |
| <i>Syn6803</i> Gln-B                               | CN               | 100 mM phosphate, pH ~7.1, 6 mM KCN, 10% D <sub>2</sub> O                 |
| <i>Syn6803</i> Gln-AB                              | CN               | 125 mM phosphate, pH ~7.2, 6 mM KCN, 10% D <sub>2</sub> O                 |
| Fe <sup>III</sup> cytochrome <i>b</i> <sub>5</sub> | His              | 5 mM phosphate, pH 7.02, 10% D <sub>2</sub> O                             |
| Fe <sup>II</sup> cytochrome <i>b</i> <sub>5</sub>  | His              | 50 mM phosphate, pH ~7.1, 10% D <sub>2</sub> O                            |
| apo cytochrome <i>b</i> <sub>5</sub> <sup>c</sup>  | n/a <sup>d</sup> | 5 mM phosphate, pH 6.97, 10% D <sub>2</sub> O, 298 K                      |

<sup>a</sup>All data acquired at 313 K unless otherwise noted. <sup>b</sup>Data were acquired at both 313 K and 283 K for this protein. <sup>c</sup>Data acquired at 298 K. <sup>d</sup>Not applicable.

**Table S2.** List of histidine pK<sub>a</sub> values and <sup>2</sup>*J*<sub>NN</sub> couplings

| Protein                          | Capping His | <sup>2</sup> <i>J</i> <sub>NN</sub> (observed) (Hz) | pK <sub>a</sub>    | <sup>2</sup> <i>J</i> <sub>NN</sub> (capped) (Hz) | pK <sub>a</sub> Remark      |
|----------------------------------|-------------|-----------------------------------------------------|--------------------|---------------------------------------------------|-----------------------------|
| CtrHb-CN, M                      | His79       | 5.0                                                 | < 3.5              | 5.0                                               | acid unfolding, Figure S7   |
| CtrHb-B-CN                       | His79       | 4.0                                                 | ~ 5.0              | 4.2                                               | Figure S7                   |
| <i>Syn7002</i> Gln               | His83       | 4.7                                                 | < 4.0              | 4.7                                               | acid unfolding, Figure S8   |
| <i>Syn6803</i> Gln               | His83       | 4.9                                                 | < 4.0              | 4.9                                               | acid unfolding <sup>1</sup> |
| ferric cyt <i>b</i> <sub>5</sub> | His80       | 5.0                                                 | < 5.5              |                                                   | <sup>2</sup>                |
| apocyt <i>b</i> <sub>5</sub>     | His80       | 5.3 <sup>a</sup>                                    | < 5.5              | 5.5                                               | closed <sup>3</sup>         |
| apocyt <i>b</i> <sub>5</sub>     | His80       | 0 <sup>b</sup>                                      | ~ 6.9              | 0 <sup>b</sup>                                    | open <sup>3</sup>           |
| AR NRRC <sup>a</sup>             | His47       | 4.0                                                 | < 4.0 <sup>c</sup> | 4.0                                               | Figure S6                   |
| AR NRRC <sup>a</sup>             | His80       | 3.9                                                 | < 4.0 <sup>c</sup> | 3.9                                               | Figure S6                   |
| AR NRRC <sup>a</sup>             | His113      | 2.1                                                 | ~ 5.7              | 2.7                                               | Figure S6                   |

<sup>a</sup>Data were acquired at 298 K for this protein. <sup>b</sup>Assumed <sup>2</sup>*J*<sub>NN</sub> for non H-bonded state.

<sup>c</sup>Estimated from absence of pH dependent chemical shift changes and comparison with previously published titration data acquired on the three-repeat consensus AR protein, NRR.

**Table S3.** Histidine tautomers, pK<sub>a</sub> values, microstate populations, and <sup>2</sup>hJ<sub>NN</sub>

|                                   | Microstate | pK <sub>a</sub>    | Population | <sup>2</sup> hJ <sub>NN</sub> (Hz) |
|-----------------------------------|------------|--------------------|------------|------------------------------------|
| wild-type CtrHb-CN <sup>a</sup>   |            |                    |            |                                    |
| observed                          | Nε2H       | < 3.5 <sup>b</sup> | –          | 5.0                                |
| capped                            | Nε2H       | 3.00 <sup>c</sup>  | ~1.0       | 5.0 <sup>d</sup>                   |
| open                              | Nε2H       | 6.53 <sup>e</sup>  | ~0         | 0                                  |
| open                              | Nδ1H       | 6.92 <sup>e</sup>  | ~0         | 0                                  |
| protonated                        | –          | –                  | ~0         | 0                                  |
| L75H CtrHb-B-CN <sup>a</sup>      |            |                    |            |                                    |
| observed                          | Nε2H       | < 5.5 <sup>b</sup> | –          | 4.0                                |
| capped                            | Nε2H       | 5.02 <sup>c</sup>  | 0.953      | 4.2 <sup>d</sup>                   |
| open                              | Nε2H       | 6.53 <sup>e</sup>  | 0.029      | 0                                  |
| open                              | Nδ1H       | 6.92 <sup>e</sup>  | 0.011      | 0                                  |
| protonated                        | –          | –                  | 0.006      | 0                                  |
| consensus AR protein <sup>f</sup> |            |                    |            |                                    |
| observed                          | Nε2H       | ~5.7 <sup>g</sup>  | –          | 2.1                                |
| capped                            | Nε2H       | 5.76 <sup>c</sup>  | 0.772      | 2.7 <sup>d</sup>                   |
| open                              | Nε2H       | 6.73 <sup>h</sup>  | 0.083      | 0                                  |
| open                              | Nδ1H       | 7.12 <sup>h</sup>  | 0.034      | 0                                  |
| protonated                        | –          | –                  | 0.112      | 0                                  |

<sup>a</sup>His79 populations evaluated at pH 7.2. <sup>b</sup>Estimated from LR-HMQC and HSQC spectra at 313 K (Figure S7). <sup>c</sup>Microscopic pK<sub>a</sub> used in the calculations. <sup>d</sup>Calculated <sup>2</sup>hJ<sub>NN</sub> value for a hypothetical 100% capped state. <sup>e</sup>Open state imidazolium pK<sub>a</sub> values for Nα-acetyl-histidine methylamide.<sup>4,5</sup> <sup>f</sup>His113 populations evaluated at pH 6.6. <sup>g</sup>Estimated from LR-HMQC and HSQC spectra at 298 K (Figure S6). <sup>h</sup>Values at 310 K<sup>5</sup> adjusted to 298 K with ΔH = 30 kJ/mol.<sup>6</sup>

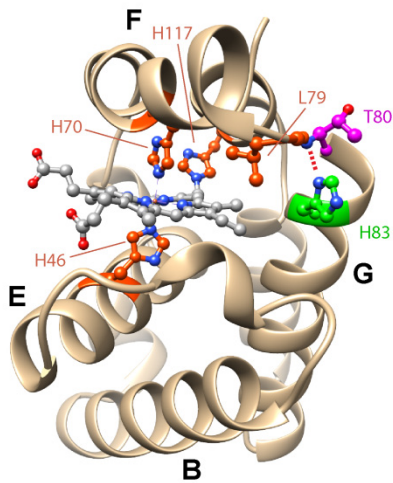

**Figure S1A.** Ribbon diagram of GlnN-A (4MAX, chain A) showing the location of the histidine N-cap in relation to the heme binding pocket. Helices B, E, F, and G are labeled according to canonical myoglobin nomenclature.

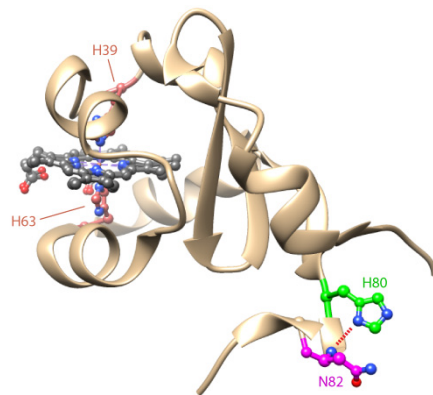

**Figure S1B.** Ribbon diagram of cytochrome *b*<sub>5</sub> (4HIL) showing the location of the histidine N-cap in relation to the heme binding pocket.

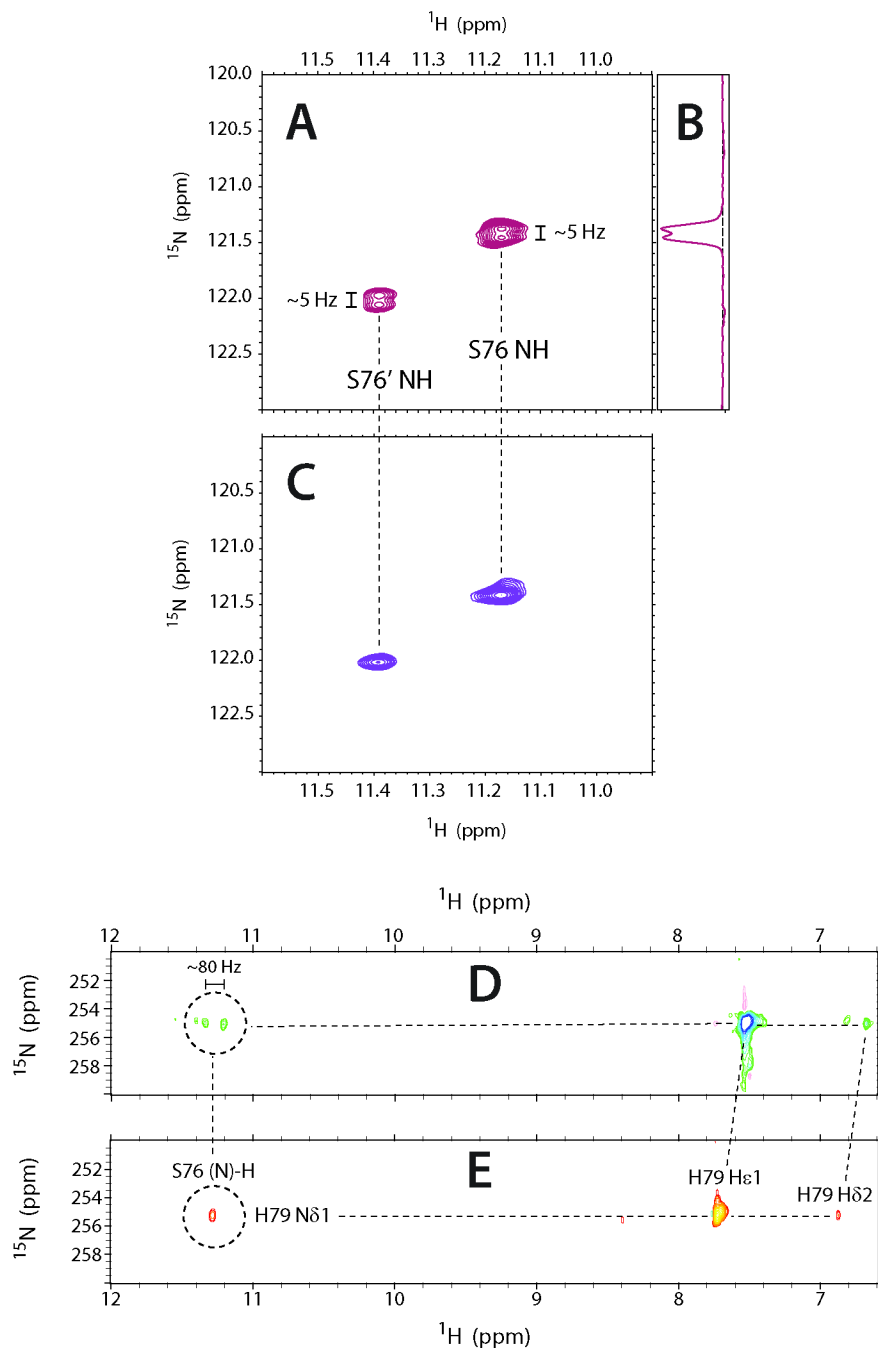

**Figure S2.** *C. eugametos* CtrHb-CN: initial experiments showing  $^1J_{\text{HN}}$  and  $^2J_{\text{NN}}$  couplings due to the Ser76 N-H $\cdots$ N $\delta$ 1 His79 H-bond

- A. Initial evidence for homonuclear  $^{15}\text{N}$ - $^{15}\text{N}$  hydrogen bond scalar coupling. High-resolution  $^1\text{H}$ - $^{15}\text{N}$  HSQC (downfield  $^1\text{H}$  region,  $^{15}\text{N}$  evolution time = 300 ms) showing partially resolved Ser76 NH  $^{15}\text{N}$  doublets. No other amide correlations in the spectrum display this splitting.
- B.  $^{15}\text{N}$  1-D slice of the Ser76 major NH signal ( $^1\text{H}$  = 11.17 ppm).

- C. High resolution  $^1\text{H}$ - $^{15}\text{N}$  HSQC (downfield  $^1\text{H}$  region,  $^{15}\text{N}$  evolution time as in a.) collected with a frequency-shifted  $^{15}\text{N}$  decoupling pulse (histidine region, 255 ppm) during the  $^{15}\text{N}$  amide evolution period. With this pulse sequence modification, the  $^{15}\text{N}$ - $^{15}\text{N}$  hydrogen bond scalar coupling is refocused and Ser76 NH signals collapse into singlets.
- D. High-sensitivity  $^1\text{H}$ - $^{15}\text{N}$  LR HMQC (downfield  $^{15}\text{N}$ ,  $^1\text{H}$  region), with  $^{15}\text{N}$  decoupling (210 ppm, 298 K) during  $^1\text{H}$  acquisition. The detection of the very weak doublet provided initial evidence for the identity of Ser76 N-H $\cdots$ N $\delta$ 1 His79 H-bonding partners. Here, the one-bond hydrogen bond scalar coupling,  $^1J_{\text{HN}}$ , is responsible for coherence transfer. The directly detected Ser76 amide proton signal remains split owing to incomplete decoupling of  $^1J_{\text{NH}}$ .
- E. As a test for the above hypothesis, a  $^1\text{H}$ - $^{15}\text{N}$  long-range HMQC spectrum (downfield  $^{15}\text{N}$ ,  $^1\text{H}$  region) was acquired with frequency-shifted  $^{15}\text{N}$  decoupling (122 ppm, 313 K) during  $^1\text{H}$  acquisition. The  $^1J_{\text{HN}}$ -mediated correlation between Ser76 amide  $^1\text{H}$  and His79 N $\delta$ 1 nuclei is observed as in d. However, in this instance, the  $^1J_{\text{NH}}$  coupling is refocused and the Ser76 amide  $^1\text{H}$  collapses into a singlet.

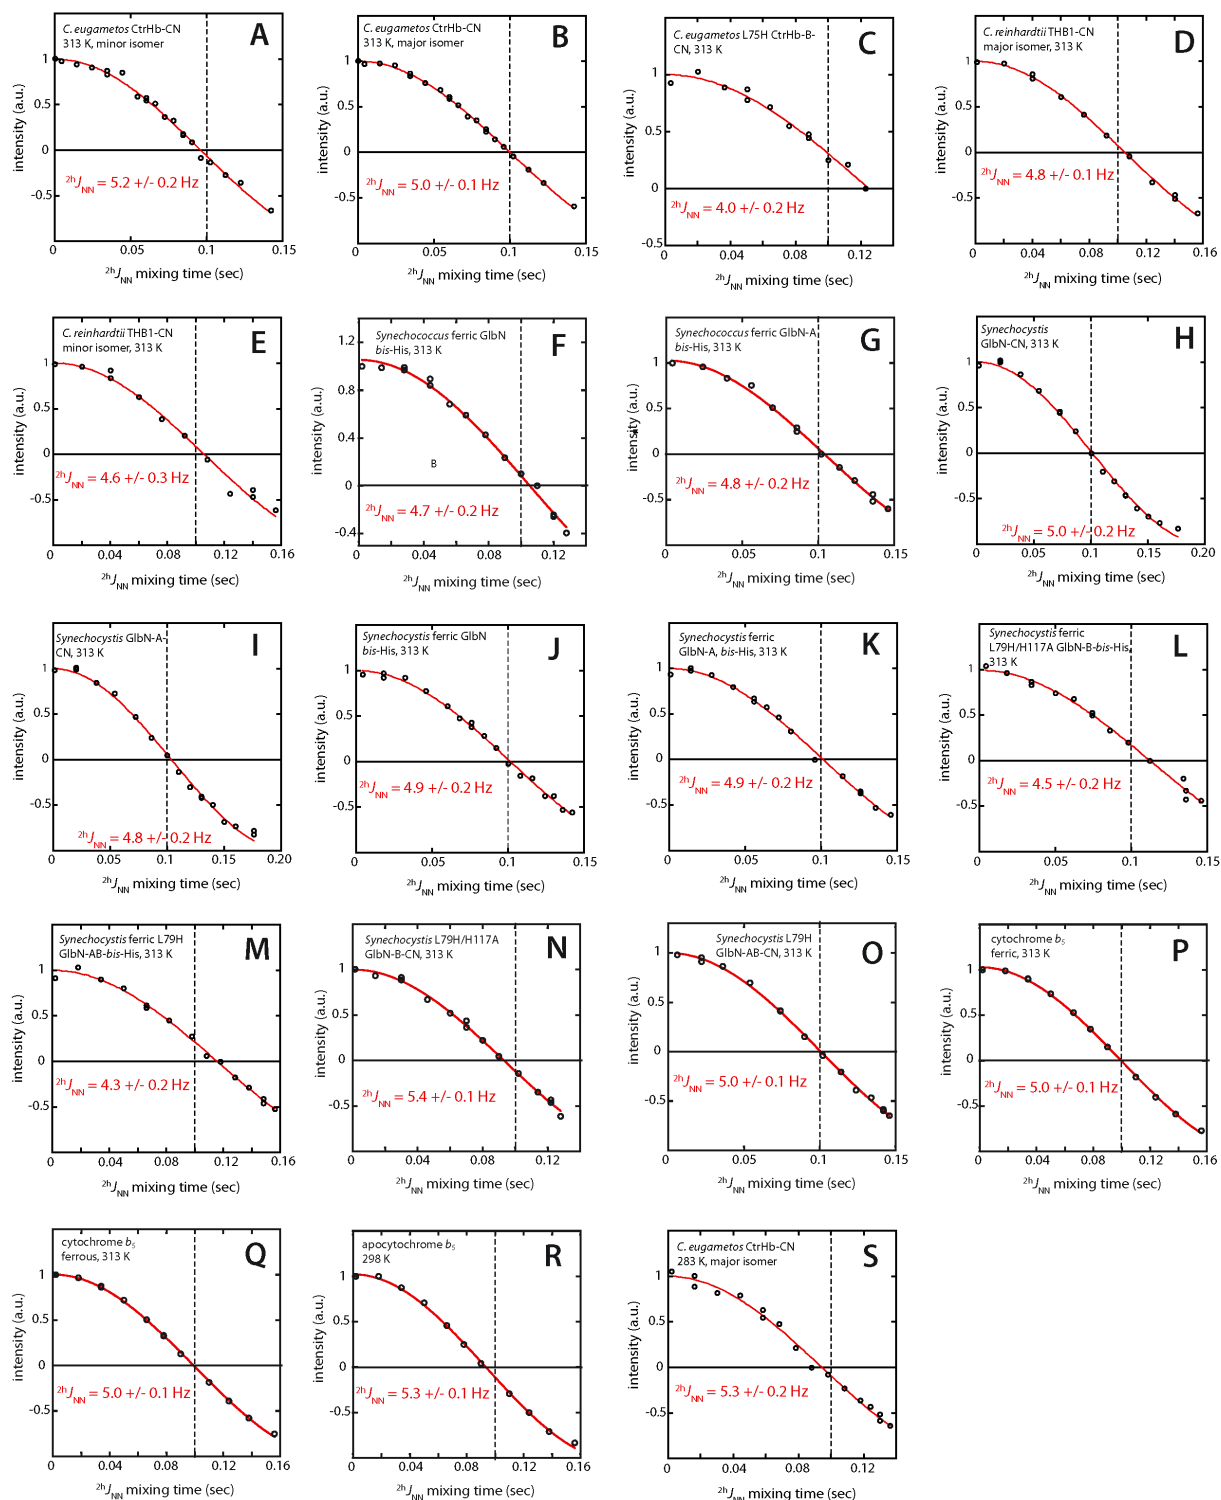

**Figure S3.**  ${}^2h J_{NN}$  modulation curves and fits obtained from constant-time spin-echo difference HSQC experiments.

Data points from an individual experiment series were collected in random order, normalized according to the maximum signal intensity, and plotted (black circles). For each data set, the



non-linear least squares best fit curve is shown with a red line. In most cases, the fitting errors were < 1%, however the errors reported for each  ${}^2\text{h}J_{\text{NN}}$  value combines an estimate for the uncertainty in peak intensity (~5 %) as obtained from duplicate data points collected at the beginning and end of each series. The black horizontal line marks zero intensity, and the vertical dashed line corresponds to the null time  ${}^2\text{h}J_{\text{NN}} = 5 \text{ Hz}$  ( $1/2J = 100 \text{ ms}$ ).

- A. *C. eugametos* cyanomet CtrHb, Ser76 N-H $\cdots$ N $\delta$ 1 His79 (minor isomer, 313 K)
- B. *C. eugametos* cyanomet CtrHb, Ser76 N-H $\cdots$ N $\delta$ 1 His79 (major isomer, 313 K)
- C. *C. eugametos* Leu75His cyanomet CtrHb-B, Ser76 N-H $\cdots$ N $\delta$ 1 His79 (engineered His75-heme cross-link, 313 K)
- D. *C. reinhardtii* cyanomet THB1, Asn87 N-H $\cdots$ N $\delta$ 1 His90 (major isomer, 313 K)
- E. *C. reinhardtii* cyanomet THB1, Asn87 N-H $\cdots$ N $\delta$ 1 His90 (minor isomer, 313 K)
- F. *Synechococcus bis*-histidine ferric GlnN, Thr80 N-H $\cdots$ N $\delta$ 1 His83 (non cross-linked, 313 K)
- G. *Synechococcus bis*-histidine ferric GlnN-A, Thr80 N-H $\cdots$ N $\delta$ 1 His83 (native His117-heme cross-link, 313 K)
- H. *Synechocystis* cyanomet GlnN, Asn80 N-H $\cdots$ N $\delta$ 1 His83 (non cross-linked, 313 K)
- I. *Synechocystis* cyanomet GlnN-A, Asn80 N-H $\cdots$ N $\delta$ 1 His83 (native His117-heme cross-link, 313 K)
- J. *Synechocystis bis*-histidine ferric GlnN, Asn80 N-H $\cdots$ N $\delta$ 1 His83 (non cross-linked, 313 K)
- K. *Synechocystis bis*-histidine ferric GlnN-A, Asn80 N-H $\cdots$ N $\delta$ 1 His83 (native His117-heme cross-link, 313 K)
- L. *Synechocystis* Leu79His/His117Ala *bis*-histidine ferric GlnN-B, Asn80 N-H $\cdots$ N $\delta$ 1 His83 (engineered His79-heme cross-link, 313 K)
- M. *Synechocystis* Leu79His *bis*-histidine ferric GlnN-AB, Asn80 N-H $\cdots$ N $\delta$ 1 His83 (His117-heme, His79-heme double cross-link, 313 K)
- N. *Synechocystis* Leu79His/His117Ala cyanomet GlnN-B, Asn80 N-H $\cdots$ N $\delta$ 1 His83 (engineered His79-heme cross-link, 313 K)
- O. *Synechocystis* Leu79His cyanomet GlnN-AB, Asn80 N-H $\cdots$ N $\delta$ 1 His83 (His117-heme, His79-heme double cross-link, 313 K)
- P. Rat microsomal cytochrome *b*<sub>5</sub>, Asp82 N-H $\cdots$ N $\delta$ 1 His80 (ferric *bis*-histidine, 313 K)
- Q. Rat microsomal cytochrome *b*<sub>5</sub>, Asp82 N-H $\cdots$ N $\delta$ 1 His80 (ferrous *bis*-histidine, 313 K)
- R. Rat microsomal apocytochrome *b*<sub>5</sub>, Asp82 N-H $\cdots$ N $\delta$ 1 His80 (apoprotein, 298 K)
- S. *C. eugametos* cyanomet CtrHb, Ser76 N-H $\cdots$ N $\delta$ 1 His79 (major isomer, 283 K)

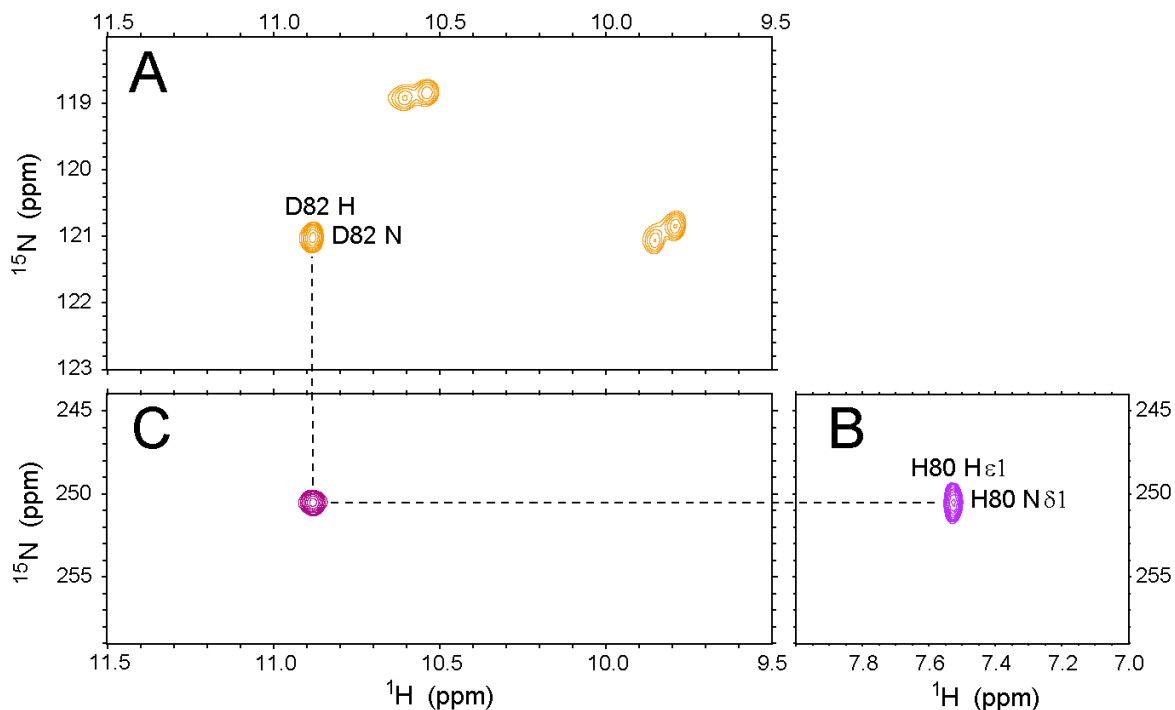

**Figure S4.** HSQC, long-range HMQC, and HNN-COSY correlation spectra used for Asp82 N-H $\cdots$ N $\delta$ 1 His80 H-bond assignment in ferric *bis*-histidine cytochrome *b*<sub>5</sub>.

- A.  $^1\text{H}$ - $^{15}\text{N}$  HSQC (downfield  $^1\text{H}$  region) showing the Asp82 NH resonance. The major and minor isomer (6:4) amide signals are indistinguishable.
- B. Histidine selective  $^1\text{H}$ - $^{15}\text{N}$  LR-HMQC ( $^{15}\text{N}$  downfield region) showing the N $\delta$ 1-H $\epsilon$ 1 correlation expected from a neutral His80 N $\epsilon$ 2-H tautomer.
- C. HNN-COSY spectrum. A single cross-peak is observed, which correlates the Asp82 amide  $^1\text{H}$  with His80  $^{15}\text{N}\delta$ 1 via the two-bond HBC,  $^2\text{h}J_{\text{NN}}$ .

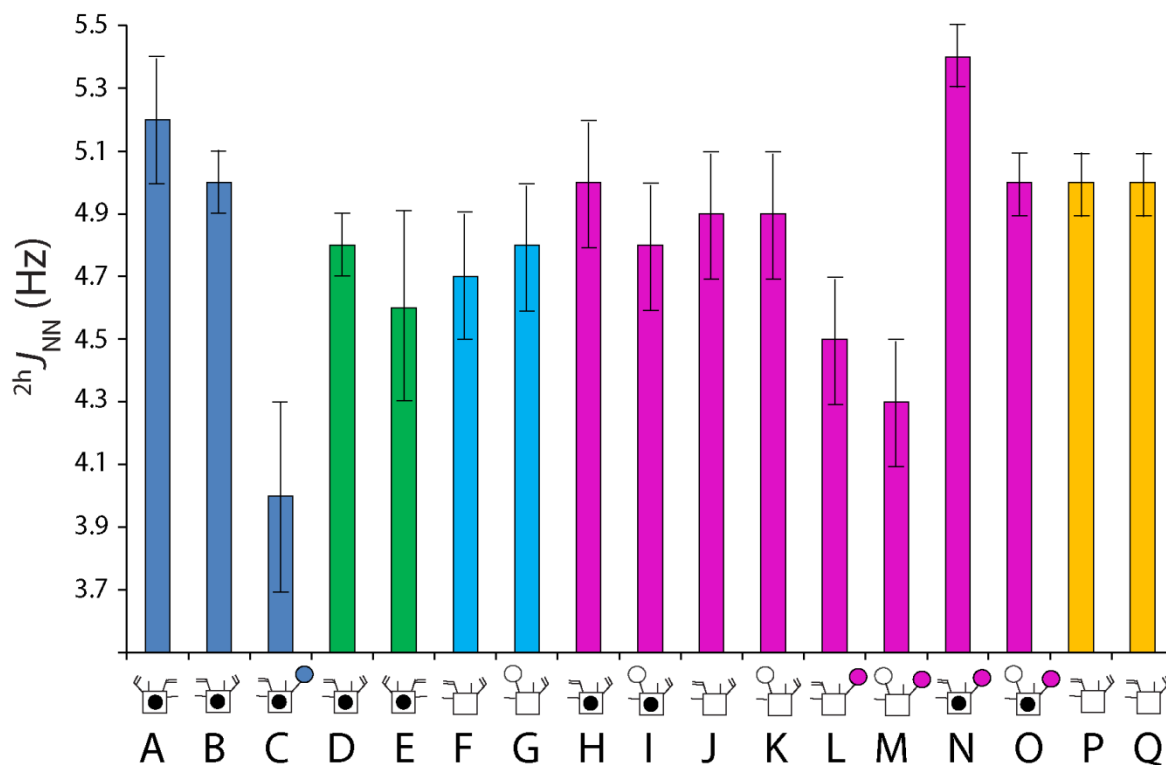

**Figure S5.** Bar graph summary of  ${}^{2h}J_{NN}$  magnitudes and estimated uncertainties determined in the present study (313 K). The x-axis labeling is as defined in Table 1 and Figure 5 (see also Figure S3). Bars are colored according to host organism (blue, *Chlamydomonas eugametos* CtrHb; green, *Chlamydomonas reinhardtii* THB1; cyan, *Synechococcus* GlbN; magenta, *Synechocystis* GlbN; orange, rat microsomal cytochrome  $b_5$ ). Heme pictographs are included to assist the reader in data interpretation: open squares correspond to *bis*-histidine complexes, squares containing black-filled circles correspond to cyanide-ligated proteins; open white circles depict the native crosslink, blue and magenta filled circles depict the engineered cross-link in CtrHb and GlbN, respectively.

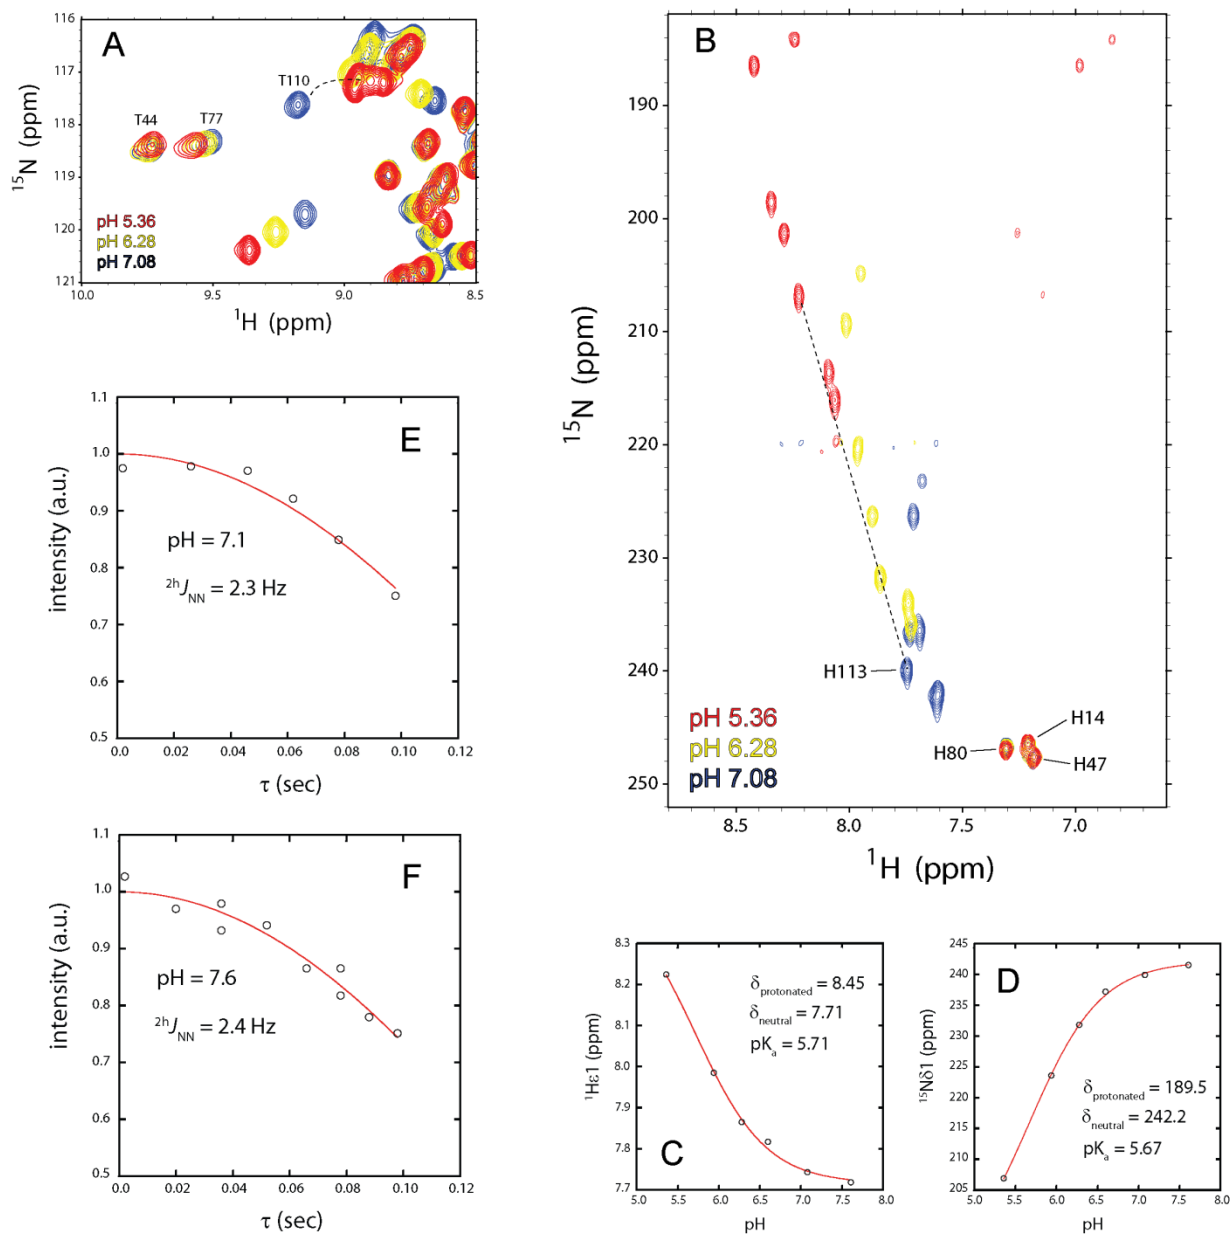

**Figure S6.** pH dependence of chemical shifts and  $^2hJ_{NN}$  couplings observed for the solvent-exposed T110-H113 H-bond within the four-repeat consensus AR protein, NRRC (298 K).

- A.  $^{15}\text{N}$ - $^1\text{H}$  HSQC spectral overlay (downfield  $^1\text{H}$  region) showing the chemical shift sensitivity of the T110 amide  $^1\text{H}$  as the pH is lowered from 7.1 to 5.4. In contrast, T44 and T77 NH signals do not register major perturbation.
- B. Overlay of histidine-selective  $^{15}\text{N}$ - $^1\text{H}$  LR-HMQC spectra (downfield region). The  $^{15}\text{N}\delta 1$  signals of the buried histidines (H14, H47, and H80) are insensitive to pH changes over the range 7.1–5.4 in an indication of low imidazole  $\text{pK}_a$ . Conversely, the H113  $^{15}\text{N}\delta 1$  undergoes a  $\sim 35$  ppm upfield shift indicative of partial protonation.

C, D  $^1\text{H}\epsilon 1$  and  $^{15}\text{N}\delta 1$  chemical shifts were fit individually using the Henderson-Hasselbalch equation

$$\delta_i = \delta_{i,\text{neutral}} + (\delta_{i,\text{protonated}} - \delta_{i,\text{neutral}}) \frac{10^{n_H(\text{pK}_a - \text{pH})}}{1 + 10^{n_H(\text{pK}_a - \text{pH})}}$$

with  $n_H$  set to 1. The estimated apparent  $\text{pK}_a$  of H113 is  $\sim 5.7$ , a value in good agreement with that obtained for the solvent exposed cap in a consensus three-repeat AR protein ( $\text{pK}_a = 5.7$ ).<sup>7</sup>

E, F  $^2\text{h}J_{\text{NN}}$ -modulation curves measured for the T110–H113 N-H $\cdots$ N $\delta 1$  H-bond as a function of pH. The HBC undergoes a nominal increase from  $\sim 2.1$  Hz (pH 6.6) to  $\sim 2.4$  Hz (pH 7.6).<sup>7</sup> This is consistent with expectations derived from the modeling illustrated in Figures 6 and 7. At pH values below 6.6, the T110 N-H signal is overlapped (see Figure S6A), and  $^2\text{h}J_{\text{NN}}$  could not be reliably measured.

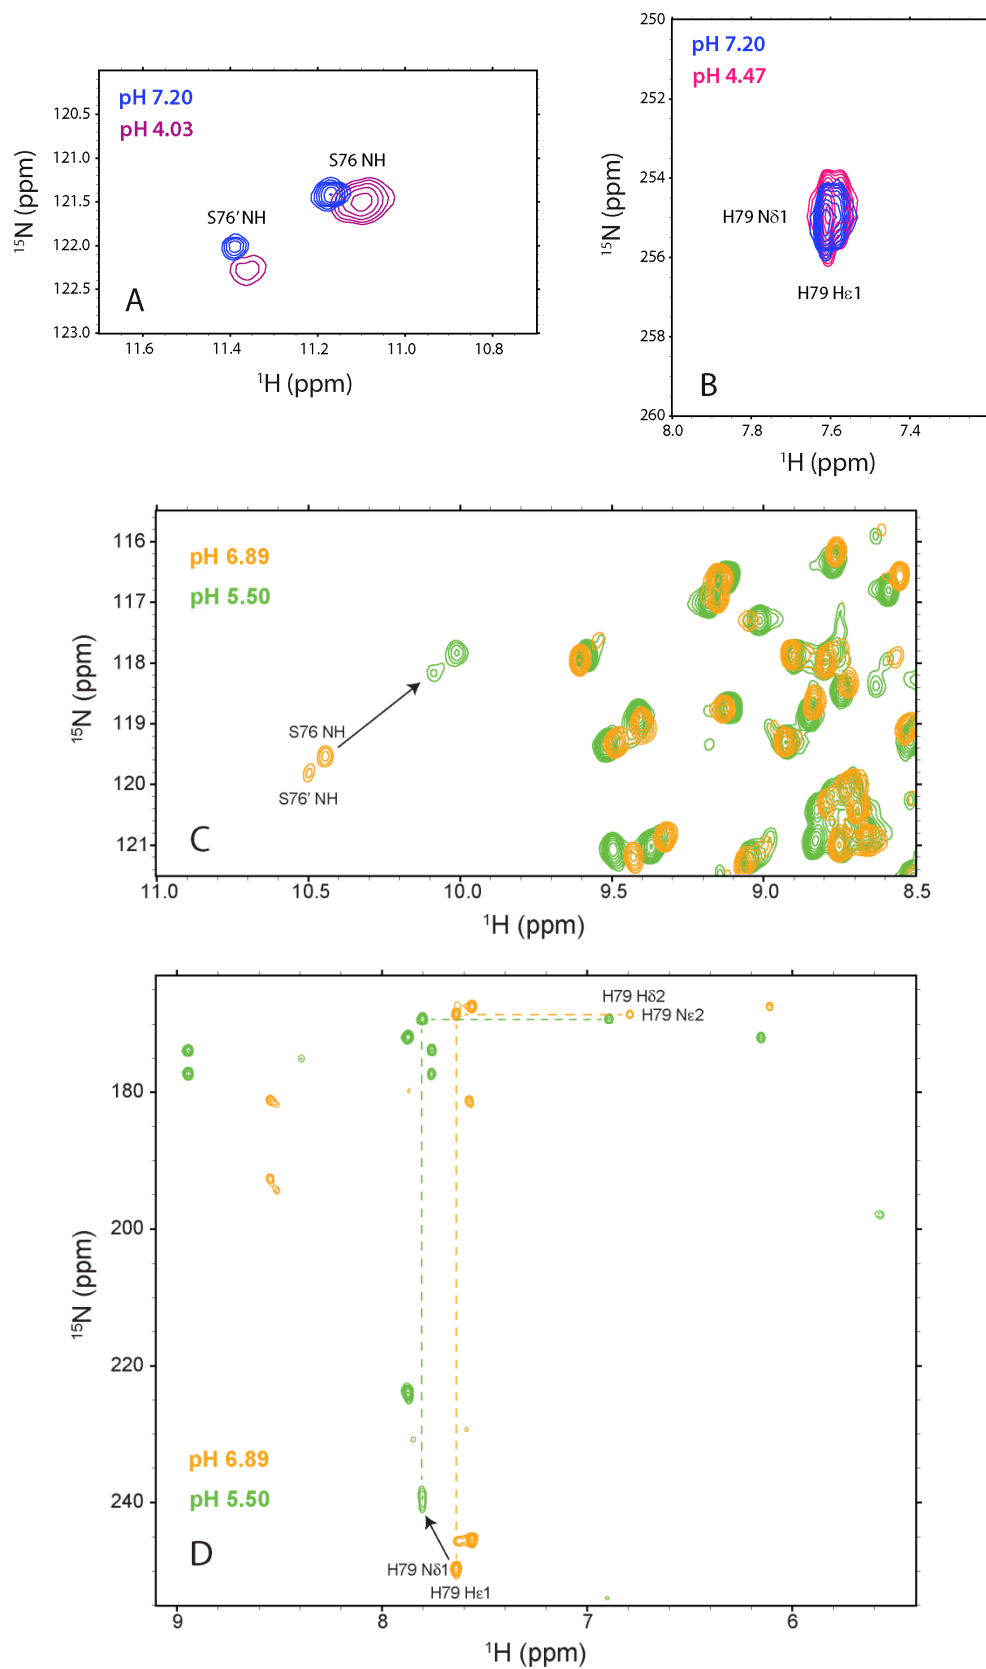

**Figure S7.** Estimate of His79  $pK_a$  in WT CtrHb-CN and L75H CtrHb-B-CN (313 K).

- A, B.  $^1\text{H}$ - $^{15}\text{N}$  HSQC (A) and  $^1\text{H}$ - $^{15}\text{N}$  LR-HMQC (B) spectra of WT CtrHb-CN showing the insensitivity of S76 amide N-H and H79 N $\delta$ 1 nuclei to sample pH. The absence of chemical shift changes over a pH range of 7.2–4.0 indicates a His79  $\text{pK}_a < 3.5$ .
- C, D.  $^1\text{H}$ - $^{15}\text{N}$  HSQC (C) and  $^1\text{H}$ - $^{15}\text{N}$  LR-HMQC (D) spectra of L75H CtrHb-B-CN showing the upfield shifts of S76 amide N-H and H79 N $\delta$ 1 nuclei as the sample pH is lowered from 6.9 to 5.5. Simulation of the chemical shift changes suggests a His79  $\text{pK}_a \sim 5.0$ .

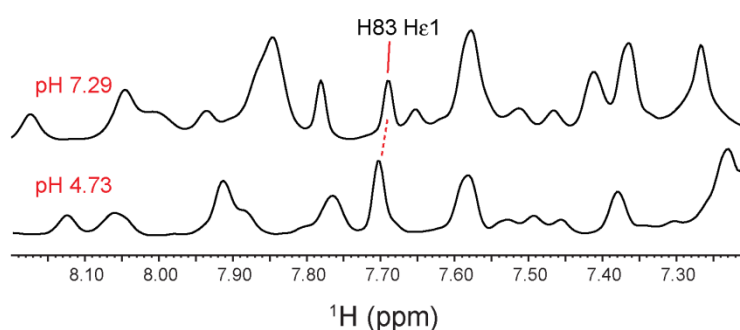

**Figure S8.** Estimate of His83  $\text{pK}_a$  in WT *Synechococcus bis*-His GlnN (298 K).  $^1\text{H}$  1-D data collected as a function of  $\text{pH}^*$  (in  $\text{D}_2\text{O}$ ) register a negligible H $\epsilon$ 1 shift compared to a full titration ( $\sim 1$  ppm change) and demonstrate a  $\text{pK}_a < 4.0$ .

## References

- (1) Vu, B. C., Vuletich, D. A., Kuriakose, S. A., Falzone, C. J., and Lecomte, J. T. J. (2004) Characterization of the heme-histidine cross-link in cyanobacterial hemoglobins from *Synechocystis* sp. PCC 6803 and *Synechococcus* sp. PCC 7002. *J. Biol. Inorg. Chem.* **9**, 183-194.
- (2) Moore, C. D., al-Misky, O. N., and Lecomte, J. T. J. (1991) Similarities in structure between holocytochrome *b*<sub>5</sub> and apocytochrome *b*<sub>5</sub>: NMR studies of the histidine residues. *Biochemistry* **30**, 8357-8365.
- (3) Lecomte, J. T. J., and Moore, C. D. (1991) Helix formation in apocytochrome *b*<sub>5</sub>: the role of a neutral histidine at the N-cap position. *J. Am. Chem. Soc.* **113**, 9663-9665.
- (4) Reynolds, W. F., Peat, I. R., Freedman, M. H., and Lyerla, J. R., Jr. (1973) Determination of the tautomeric form of the imidazole ring of L-histidine in basic solution by carbon-13 magnetic resonance spectroscopy. *J. Am. Chem. Soc.* **95**, 328-331.
- (5) Tanokura, M. (1983) <sup>1</sup>H-NMR study on the tautomerism of the imidazole ring of histidine residues. I. Microscopic pK values and molar ratios of tautomers in histidine-containing peptides. *Biochim. Biophys. Acta* **742**, 576-585.
- (6) Boschcov, P., Seidel, W., Muradian, J., Tominaga, M., Paiva, A. C. M., and Juliano, L. (1983) Ionization constants and thermodynamic parameters of histidine and derivatives. *Bioorg. Chem.* **12**, 34-44.
- (7) Preimesberger, M. R., Majumdar, A., Aksel, T., Sforza, K., Lectka, T., Barrick, D., and Lecomte, J. T. (2015) Direct NMR detection of bifurcated hydrogen bonding in the  $\alpha$ -helix N-caps of ankyrin repeat proteins. *J. Am. Chem. Soc.* **137**, 1008-1011.
